# Supplementary material
Source: publisher figshare collection journal article supplement (https://f1000.figshare.com/ndownloader/files/142949)
Supplement: Supplementary file 1 [file 142949]

Genotype	D42/UAS-hSOD1						Genotype	D42/CS					Genotype	D42/dsod
Date started	08/27/2008						Date started	8/9/2008					Date started	8/9/2008
Days	Vial 1	Vial 2	Vial 3	Vial 4	Vial 5		Days	Vial 1	Vial 2	Vial 3			Days	Vial 1	Vial 2	Vial 3	Vial 4
1	10	10	10	10	10		1	10	10	10			1	10	10	10	10
2	10	10	10	10	10		2	10	10	10			2	10	10	10	10
3	10	10	10	10	10		3	10	10	10			3	10	10	10	10
4	10	10	10	10	10		4	10	10	10			4	10	10	10	10
5	10	10	10	10	10		5	9	9	9			5	10	10	10	10
6	10	10	10	10	10		6	9	9	9			6	9	10	10	10
7	10	10	10	10	10		7	9	9	9			7	9	10	10	9
8	10	10	10	10	10		8	9	9	9			8	9	9	8	9
9	10	10	10	10	10		9	7	7	7			9	9	6	7	8
10	10	10	10	10	10		10	7	7	7			10	8	5	7	6
11	10	10	10	10	10		11	7	0	7			11	6	5	6	4
12	10	10	10	10	10		12	4	0	4			12	5	5	5	1
13	10	10	10	10	10		13	4	0	4			13	4	5	5	1
14	10	10	10	9	10		14	3	0	3			14	4	3	4	1
15	10	10	10	8	10		15	0	0	0			15	2	3	2	1
16	10	9	10	7	10		16						16	1	1	1	0
17	10	8	10	5	10		17						17	1	0	0	0
18	9	7	9	2	6		18						18	0	0	0	0
19	8	6	8	2	5		19						19	0	0	0	0
20	7	5	7	1	4		20						20	0	0	0	0
21	5	4	4	1	3		21						21	0	0	0	0
22	3	3	2	0	2		22						22
23	0	0	0	0	0		23						23
24							24						24
25							25						25
26							26						26
27							27						27
28							28						28
29							29						29
30							30						30
Genotype	D42/A4V						Genotype	D42/G85R
Date started	8/9/2008						Date started	8/9/2008
Days	Vial 1	Vial 2	Vial 3				Days	Vial 1	Vial 2	Vial 3	Vial 4	Vial 5
1	10	10	10				1	10	10	10	10	10
2	10	10	10				2	10	10	10	10	10
3	10	10	10				3	10	10	10	10	10
4	10	10	10				4	10	10	10	10	10
5	10	10	10				5	10	10	10	10	10
6	10	10	10				6	10	10	10	10	10
7	10	10	10				7	10	10	10	10	10
8	10	10	10				8	10	10	10	10	10
9	10	10	10				9	10	10	10	10	10
10	10	10	10				10	10	10	10	10	10
11	10	10	9				11	10	10	9	10	10
12	9	9	8				12	8	8	10	10	9
13	7	8	7				13	7	7	9	9	7
14	6	6	7				14	6	6	8	8	7
15	5	5	7				15	5	6	7	7	6
16	4	4	6				16	4	5	5	6	5
17	3	3	6				17	3	4	4	4	4
18	3	3	5				18	2	3	3	3	3
19	3	3	4				19	1	2	2	2	2
20	3	2	3				20	1	2	1	2	1
21	3	2	2				21	0	2	1	1	1
22	2	2	2				22	0	2	1	1	0
23	2	1	1				23	0	1	0	1	0
24	1	0	1				24	0	0	0	0	0
25	0	0	0				25
26							26
27							27
28							28
29							29
30							30
